# Supplementary material for: Comparative Analysis of Chemical Profile and Biological Activity of Juniperus communis L. Berry Extracts
Source: MDPI journal article supplement (doi:10.3390/plants12193401), 2023-09-27
Supplement: s1 [file s1]

**Table S1.** Influence of factors on extraction yield according to ANOVA multiple analysis of variance ( $p < 0.05$  is considered significant).

| Factor                   | P- <i>m</i> | P- <i>usm</i> | C- <i>m</i> | C- <i>usm</i> | A- <i>m</i> | A- <i>usm</i> | M- <i>m</i> | M- <i>usm</i> | E- <i>m</i> | E- <i>usm</i> |
|--------------------------|-------------|---------------|-------------|---------------|-------------|---------------|-------------|---------------|-------------|---------------|
| P- <i>m</i> <sup>1</sup> |             | 0.000         | 0.305       | 0.000         | 0.000       | 0.000         | 0.000       | 0.000         | 0.000       | 0.000         |
| P- <i>usm</i>            |             |               | 0.000       | 0.116         | 0.000       | 0.000         | 0.000       | 0.000         | 0.000       | 0.000         |
| C- <i>m</i>              | 0.305       |               |             | 0.000         | 0.000       | 0.000         | 0.000       | 0.000         | 0.000       | 0.000         |
| C- <i>usm</i>            |             | 0.116         |             |               | 0.000       | 0.000         | 0.000       | 0.000         | 0.000       | 0.000         |
| A- <i>m</i>              |             |               |             |               |             | 0.000         | 0.000       | 0.000         | 0.000       | 0.000         |
| A- <i>usm</i>            |             |               |             |               |             |               | 0.073       | 0.000         | 0.000       | 0.000         |
| M- <i>m</i>              |             |               |             |               |             | 0.073         |             | 0.000         | 0.000       | 0.000         |
| M- <i>usm</i>            |             |               |             |               |             |               |             |               | 0.000       | 0.000         |
| E- <i>m</i>              |             |               |             |               |             |               |             |               |             | 0.000         |
| E- <i>usm</i>            |             |               |             |               |             |               |             |               |             |               |

<sup>1</sup>P-*m* – Pentane, maceration; P-*usm* – Pentane, ultrasound-assisted maceration; C-*m* – Chloroform, maceration; C-*usm* – Chloroform, ultrasound-assisted maceration; A-*m* – Acetone, maceration; A-*usm* – Acetone, ultrasound-assisted maceration; M-*m* – Methanol, maceration; M-*usm* – Methanol, ultrasound-assisted maceration; E-*m* – 70% ethanol, maceration; E-*usm* – 70% ethanol, ultrasound-assisted maceration.

**Table S2.** Influence of factors on total phenolic compounds according to ANOVA multiple analysis of variance ( $p < 0.05$  is considered significant).

| Factor                   | P- <i>m</i> | P- <i>usm</i> | C- <i>m</i> | C- <i>usm</i> | A- <i>m</i> | A- <i>usm</i> | M- <i>m</i> | M- <i>usm</i> | E- <i>m</i> | E- <i>usm</i> |
|--------------------------|-------------|---------------|-------------|---------------|-------------|---------------|-------------|---------------|-------------|---------------|
| P- <i>m</i> <sup>1</sup> |             | 1.000         | 0.000       | 0.000         | 0.000       | 0.000         | 0.000       | 0.000         | 0.000       | 0.000         |
| P- <i>usm</i>            | 1.000       |               | 0.000       | 0.000         | 0.000       | 0.000         | 0.000       | 0.000         | 0.000       | 0.000         |
| C- <i>m</i>              |             |               |             | 0.006         | 0.000       | 0.000         | 0.000       | 0.000         | 0.000       | 0.000         |
| C- <i>usm</i>            |             |               | 0.006       |               | 0.000       | 0.000         | 0.000       | 0.000         | 0.000       | 0.000         |
| A- <i>m</i>              |             |               |             |               |             | 0.000         | 0.998       | 0.000         | 0.000       | 0.000         |
| A- <i>usm</i>            |             |               |             |               |             |               | 0.000       | 0.000         | 0.000       | 0.000         |
| M- <i>m</i>              |             |               |             |               | 0.998       |               |             | 0.000         | 0.000       | 0.000         |
| M- <i>usm</i>            |             |               |             |               |             |               |             |               | 0.000       | 0.000         |
| E- <i>m</i>              |             |               |             |               |             |               |             |               |             | 0.000         |
| E- <i>usm</i>            |             |               |             |               |             |               |             |               |             |               |

<sup>1</sup>P-*m* – Pentane, maceration; P-*usm* – Pentane, ultrasound-assisted maceration; C-*m* – Chloroform, maceration; C-*usm* – Chloroform, ultrasound-assisted maceration; A-*m* – Acetone, maceration; A-*usm* – Acetone, ultrasound-assisted maceration; M-*m* – Methanol, maceration; M-*usm* – Methanol, ultrasound-assisted maceration; E-*m* – 70% ethanol, maceration; E-*usm* – 70% ethanol, ultrasound-assisted maceration.

**Table S3.** Influence of factors on total sugars according to ANOVA multiple analysis of variance ( $p < 0.05$  is considered significant).

| Factor                   | P- <i>m</i> | P- <i>usm</i> | C- <i>m</i> | C- <i>usm</i> | A- <i>m</i> | A- <i>usm</i> | M- <i>m</i> | M- <i>usm</i> | E- <i>m</i> | E- <i>usm</i> |
|--------------------------|-------------|---------------|-------------|---------------|-------------|---------------|-------------|---------------|-------------|---------------|
| P- <i>m</i> <sup>1</sup> |             | 0.000         | 0.000       | 0.000         | 0.000       | 0.000         | 0.000       | 0.000         | 0.000       | 0.000         |
| P- <i>usm</i>            |             |               | 0.000       | 0.000         | 0.000       | 0.000         | 0.000       | 0.000         | 0.000       | 0.000         |
| C- <i>m</i>              |             |               |             | 0.977         | 0.000       | 0.000         | 0.000       | 0.000         | 0.000       | 0.000         |
| C- <i>usm</i>            |             |               | 0.977       |               | 0.000       | 0.000         | 0.000       | 0.000         | 0.000       | 0.000         |
| A- <i>m</i>              |             |               |             |               |             | 0.000         | 0.000       | 1.000         | 0.000       | 0.000         |
| A- <i>usm</i>            |             |               |             |               |             |               | 0.000       | 0.000         | 0.000       | 0.000         |

|               |       |  |       |       |       |
|---------------|-------|--|-------|-------|-------|
| M- <i>m</i>   |       |  | 0.000 | 0.000 | 0.000 |
| M- <i>usm</i> | 1.000 |  |       | 0.000 | 0.000 |
| E- <i>m</i>   |       |  |       |       | 0.000 |
| E- <i>usm</i> |       |  |       |       |       |

<sup>1</sup>P-*m* – Pentane, maceration; P-*usm* – Pentane, ultrasound-assisted maceration; C-*m* – Chloroform, maceration; C-*usm* – Chloroform, ultrasound-assisted maceration; A-*m* – Acetone, maceration; A-*usm* – Acetone, ultrasound-assisted maceration; M-*m* – Methanol, maceration; M-*usm* – Methanol, ultrasound-assisted maceration; E-*m* – 70% ethanol, maceration; E-*usm* – 70% ethanol, ultrasound-assisted maceration.

**Table S4.** Influence of factors on total flavonoids according to ANOVA multiple analysis of variance (p < 0.05 is considered significant).

| Factor                   | P- <i>m</i> | P- <i>usm</i> | C- <i>m</i> | C- <i>usm</i> | A- <i>m</i> | A- <i>usm</i> | M- <i>m</i> | M- <i>usm</i> | E- <i>m</i> | E- <i>usm</i> |
|--------------------------|-------------|---------------|-------------|---------------|-------------|---------------|-------------|---------------|-------------|---------------|
| P- <i>m</i> <sup>1</sup> |             | 0.631         | 0.000       | 0.000         | 0.000       | 0.000         | 0.000       | 0.000         | 0.000       | 0.000         |
| P- <i>usm</i>            | 0.631       |               | 0.000       | 0.000         | 0.000       | 0.000         | 0.000       | 0.000         | 0.000       | 0.000         |
| C- <i>m</i>              |             |               |             | 0.000         | 0.000       | 0.000         | 0.000       | 0.000         | 0.000       | 0.000         |
| C- <i>usm</i>            |             |               |             |               | 0.000       | 0.000         | 0.000       | 0.000         | 0.000       | 0.000         |
| A- <i>m</i>              |             |               |             |               |             | 0.000         | 0.993       | 0.000         | 0.000       | 0.000         |
| A- <i>usm</i>            |             |               |             |               |             |               | 0.000       | 0.000         | 0.000       | 0.000         |
| M- <i>m</i>              |             |               |             |               | 0.993       |               |             | 0.000         | 0.000       | 0.000         |
| M- <i>usm</i>            |             |               |             |               |             |               |             |               | 0.000       | 0.000         |
| E- <i>m</i>              |             |               |             |               |             |               |             |               |             | 0.000         |
| E- <i>usm</i>            |             |               |             |               |             |               |             |               |             |               |

<sup>1</sup>P-*m* – Pentane, maceration; P-*usm* – Pentane, ultrasound-assisted maceration; C-*m* – Chloroform, maceration; C-*usm* – Chloroform, ultrasound-assisted maceration; A-*m* – Acetone, maceration; A-*usm* – Acetone, ultrasound-assisted maceration; M-*m* – Methanol, maceration; M-*usm* – Methanol, ultrasound-assisted maceration; E-*m* – 70% ethanol, maceration; E-*usm* – 70% ethanol, ultrasound-assisted maceration.

**Table S5.** Influence of factors on total terpenoids according to ANOVA multiple analysis of variance (p < 0.05 is considered significant).

| Factor                   | P- <i>m</i> | P- <i>usm</i> | C- <i>m</i> | C- <i>usm</i> | A- <i>m</i> | A- <i>usm</i> | M- <i>m</i> | M- <i>usm</i> | E- <i>m</i> | E- <i>usm</i> |
|--------------------------|-------------|---------------|-------------|---------------|-------------|---------------|-------------|---------------|-------------|---------------|
| P- <i>m</i> <sup>1</sup> |             | 0.256         | 0.000       | 0.995         | 0.000       | 0.000         | 0.000       | 0.000         | 0.000       | 0.000         |
| P- <i>usm</i>            | 0.256       |               | 0.000       | 0.028         | 0.000       | 0.000         | 0.000       | 0.000         | 0.000       | 0.000         |
| C- <i>m</i>              |             |               |             | 0.007         | 0.000       | 0.000         | 0.000       | 0.000         | 0.000       | 0.000         |
| C- <i>usm</i>            | 0.995       | 0.028         | 0.007       |               | 0.000       | 0.000         | 0.000       | 0.000         | 0.000       | 0.000         |
| A- <i>m</i>              |             |               |             |               |             | 0.000         | 0.000       | 0.000         | 0.000       | 0.000         |
| A- <i>usm</i>            |             |               |             |               |             |               | 0.998       | 0.000         | 0.000       | 0.000         |
| M- <i>m</i>              |             |               |             |               |             | 0.998         |             | 0.000         | 0.000       | 0.000         |
| M- <i>usm</i>            |             |               |             |               |             |               |             |               | 0.000       | 0.000         |
| E- <i>m</i>              |             |               |             |               |             |               |             |               |             | 0.989         |
| E- <i>usm</i>            |             |               |             |               |             |               |             |               | 0.989       |               |

<sup>1</sup>P-*m* – Pentane, maceration; P-*usm* – Pentane, ultrasound-assisted maceration; C-*m* – Chloroform, maceration; C-*usm* – Chloroform, ultrasound-assisted maceration; A-*m* – Acetone, maceration; A-*usm* – Acetone, ultrasound-assisted maceration; M-*m* – Methanol, maceration; M-*usm* – Methanol, ultrasound-assisted maceration; E-*m* – 70% ethanol, maceration; E-*usm* – 70% ethanol, ultrasound-assisted maceration.

**Table S6.** Influence of factors on content of ascorbic acid according to ANOVA multiple analysis of variance ( $p < 0.05$  is considered significant).

| Factor                   | P- <i>m</i> | P- <i>usm</i> | C- <i>m</i> | C- <i>usm</i> | A- <i>m</i> | A- <i>usm</i> | M- <i>m</i> | M- <i>usm</i> | E- <i>m</i> | E- <i>usm</i> |
|--------------------------|-------------|---------------|-------------|---------------|-------------|---------------|-------------|---------------|-------------|---------------|
| P- <i>m</i> <sup>1</sup> |             | 0.000         | 0.000       | 0.000         | 0.000       | 0.000         | 0.000       | 0.000         | 0.000       | 0.000         |
| P- <i>usm</i>            |             |               | 0.000       | 0.000         | 0.000       | 0.000         | 0.000       | 0.000         | 0.000       | 0.000         |
| C- <i>m</i>              |             |               |             | 0.000         | 0.000       | 0.000         | 0.000       | 0.000         | 0.000       | 0.000         |
| C- <i>usm</i>            |             |               |             |               | 0.000       | 0.000         | 0.000       | 0.000         | 0.000       | 0.000         |
| A- <i>m</i>              |             |               |             |               |             | 0.000         | 0.002       | 0.000         | 0.000       | 0.000         |
| A- <i>usm</i>            |             |               |             |               |             |               | 0.000       | 0.000         | 0.000       | 0.000         |
| M- <i>m</i>              |             |               |             |               | 0.002       |               |             | 0.328         | 0.000       | 0.000         |
| M- <i>usm</i>            |             |               |             |               |             |               | 0.328       |               | 0.000       | 0.000         |
| E- <i>m</i>              |             |               |             |               |             |               |             |               |             | 0.000         |
| E- <i>usm</i>            |             |               |             |               |             |               |             |               |             |               |

<sup>1</sup>P-*m* – Pentane, maceration; P-*usm* – Pentane, ultrasound-assisted maceration; C-*m* – Chloroform, maceration; C-*usm* – Chloroform, ultrasound-assisted maceration; A-*m* – Acetone, maceration; A-*usm* – Acetone, ultrasound-assisted maceration; M-*m* – Methanol, maceration; M-*usm* – Methanol, ultrasound-assisted maceration; E-*m* – 70% ethanol, maceration; E-*usm* – 70% ethanol, ultrasound-assisted maceration.

**Table S7.** GC-MS identification and quantification of components of 1 and 2 year old *J. communis* L. berries and the ratio of the mass of an ion to its charge.

| №2  | <i>t</i> <sub>R</sub> <sup>3</sup> , (min) | Component                              | **m/z and peak relative intensity (%)                     | <sup>4</sup> ω, %      |                  |                  |                  | Class of compounds   |
|-----|--------------------------------------------|----------------------------------------|-----------------------------------------------------------|------------------------|------------------|------------------|------------------|----------------------|
|     |                                            |                                        |                                                           | <sup>1</sup> JB1E<br>* | JB1A<br>*        | JB2E<br>*        | JB2A<br>*        |                      |
| 1.  | 3.962                                      | 1-Hydroxybut-3-en-2-one                | 86 ([M+] <sup>***</sup> , 3 %), 55 (100%), 27 (%), 31 (%) | nd <sup>5</sup>        | nd               | 1.913<br>±0.005  | nd               | ketone               |
| 2.  | 4.063                                      | Acetol                                 | 74 ([M+], 7 %), 43 (100%), 31 (23%), 15 (18%)             | nd                     | nd               | 3.439<br>±0.009  | 0.828<br>±0.006  | α-hydroxy ketones    |
| 3.  | 4.199                                      | 2-Hydroxy-3-oxobutanal                 | 102 ([M+], 7 %), 43 (100%), 42 (8%),                      | nd                     | nd               | 2.427<br>±0.007  | nd               | beta-ketoaldehydes   |
| 4.  | 4.675                                      | Glyceraldehyde                         | 90 ([M+], 0 %), 31 (100%), 29 (71%), 43 (52%)             | nd                     | nd               | 0.785<br>±0.004  | 3.548<br>±0.009  | Monosaccharide       |
| 5.  | 5.288                                      | Methyl 2-oxopropanoate                 | 102 ([M+], 11 %), 43 (100%), 42 (8%), 15 (6%)             | nd                     | nd               | 1.131<br>±0.006  | nd               | Keto acid            |
| 6.  | 5.507                                      | Dihydroxyacetone                       | 90 ([M+], 0 %), 31 (100%), 43 (33%), 29 (26%)             | 0.625<br>±0.005        | 1.414<br>±0.003  | 39.830<br>±0.009 | 17.487<br>±0.009 | Monosaccharide       |
| 7.  | 6.016                                      | 2-Cyclopenten-1-one, 2-hydroxy-        | 98 ([M+], 100 %), 55 (63%), 42 (55%), 41 (34%)            | nd                     | nd               | 0.642<br>±0.003  | nd               | Lactone              |
| 8.  | 6.310                                      | α-Pinene                               | 136 ([M+], 1 %), 93 (100%), 91 (41%), 92 (38%)            | 42.272<br>±0.011       | 40.944<br>±0.013 | 20.558<br>±0.008 | 40.388<br>±0.014 | Monoterpene          |
| 9.  | 6.783                                      | 1,2,3-Propanetriol                     | 92 ([M+], 0 %), 61 (100%), 43 (78%), 31 (39%)             | nd                     | nd               | 1.868<br>±0.004  | 7.337<br>±0.008  | Polyalcohol          |
| 10. | 6.883                                      | Sabinene                               | 136 ([M+], 15 %), 93 (100%), 91 (42%), 77 (38%)           | 0.564<br>±0.008        | 0.482<br>±0.004  | nd               | nd               | Bicyclic monoterpene |
| 11. | 6.944                                      | 2-Hydroxy-γ-butyrolactone              | 102 ([M+], 0 %), 57 (100%), 58 (%), 29 (%)                | nd                     | nd               | 1.279<br>±0.011  | nd               | Lactone              |
| 12. | 7.033                                      | β-Myrcene                              | 136 ([M+], 1 %), 93 (100%), 41 (98%), 69 (85%)            | 8.467<br>±0.011        | 7.491<br>±0.009  | 3.553<br>±0.005  | 6.411<br>±0.007  | Monoterpene          |
| 13. | 7.456                                      | δ-3-Carene                             | 136 ([M+], 30 %), 93 (100%), 91 (50%), 92 (31%)           | 1.155<br>±0.002        | 1.063<br>±0.005  | nd               | nd               | Bicyclic monoterpene |
| 14. | 7.757                                      | Limonene                               | 136 ([M+], 23 %), 68 (100%), 93 (50%), 67 (44%)           | 0.546<br>±0.006        | 0.502<br>±0.004  | nd               | nd               | Cyclic monoterpene   |
| 15. | 8.284                                      | 4-Methyl-1H-pyrazole-3-carboxylic acid | 126 ([M+], 100 %), 55 (100%), 83 (22%), 70 (10%)          | nd                     | nd               | 0.829<br>±0.007  | nd               | Pyrazole             |

|     |        |                                                                                                                                                     |                                                    |                  |                  |                  |                 |                             |
|-----|--------|-----------------------------------------------------------------------------------------------------------------------------------------------------|----------------------------------------------------|------------------|------------------|------------------|-----------------|-----------------------------|
| 16. | 9.574  | Verbenol                                                                                                                                            | 152 ([M+], 0 %), 91 (100%), 41 (75%), 94 (72%)     | nd               | nd               | 0.964<br>±0.005  | 0.852<br>±0.006 | Monoterpene al-<br>cohol    |
| 17. | 10.341 | 2H-Pyran-2-methanol, tetrahy-<br>dro-                                                                                                               | 116 ([M+], 0 %), 85 (100%), 29 (58%), 41 (57%)     | nd               | nd               | 0.911<br>±0.008  | nd              | Pyran                       |
| 18. | 10.517 | Verbenone                                                                                                                                           | 150 ([M+], 45 %), 107 (100%), 135 (69%), 39 (64%)  | nd               | nd               | 0.324<br>±0.002  | 0.865<br>±0.004 | Monoterpene ke-<br>tone     |
| 19. | 10.782 | 1,2,3-Propanetriol, 1,2-diacetate                                                                                                                   | 176 ([M+], 0 %), 43 (100%), 103 (18%), 44 (6%)     | nd               | nd               | 0.772<br>±0.003  | nd              | Lipid (diacyl-<br>glycerol) |
| 20. | 11.033 | Methyl citronellate                                                                                                                                 | 184 ([M+], 4 %), 69 (100%), 95 (76%), 110 (75%)    | 0.428<br>±0.006  | 0.470<br>±0.004  | nd               | nd              | Acyclic mono-<br>terpenoid  |
| 21. | 11.581 | Bornyl acetate                                                                                                                                      | 196 ([M+], 3 %), 95 (100%), 43 (76 %), 93 (46%)    | nd               | 0.438<br>±0.002  | nd               | nd              | Bicyclic mono-<br>terpenoid |
| 22. | 13.061 | β-Elemene                                                                                                                                           | 204 ([M+], 2 %), 93 (100%), 81 (88%), 107 (65%)    | 0.607<br>±0.003  | 0.393<br>±0.004  | 0.534<br>±0.003  | nd              | Sesquiterpene               |
| 23. | 13.552 | Caryophyllene                                                                                                                                       | 204 ([M+], 7 %), 41 (100%), 93 (79%), 69 (76%)     | 2.427<br>±0.011  | 2.241<br>±0.009  | 1.053<br>±0.007  | 1.081<br>±0.008 | Sesquiterpene               |
| 24. | 13.717 | (E)-β-Farnesene                                                                                                                                     | 204 ([M+], 4 %), 41 (100%), 69 (79%), 93 (45%)     | 0.375<br>±0.003  | 0.347<br>±0.004  | nd               | nd              | Sesquiterpene               |
| 25. | 14.007 | α-Humulene (α-Caryophyllene)                                                                                                                        | 204 ([M+], 5 %), 93 (100%), 80 (39%), 121 (25%)    | 1.720<br>±0.011  | 1.537<br>±0.012  | 0.546<br>±0.009  | 0.935<br>±0.008 | Sesquiterpene               |
| 26. | 14.312 | Germacrene D                                                                                                                                        | 204 ([M+], 17 %), 161 (100%), 105 (85%), 91 (58%), | 14.440<br>±0.010 | 14.769<br>±0.013 | 4.132<br>±0.007  | 6.823<br>±0.003 | Sesquiterpene               |
| 27. | 14.487 | Bicyclogermacrene                                                                                                                                   | 204 ([M+], 16 %), 121 (100%), 93 (68%), 41 (56%)   | 0.493<br>±0.003  | nd               | nd               | nd              | Sesquiterpene               |
| 28. | 15.444 | Germacrene D-4-ol                                                                                                                                   | 222 ([M+], 2 %), 81 (100%), 43 (77%), 41 (40%)     | 1.766<br>±0.008  | 1.941<br>±0.009  | 0.857<br>±0.007  | 1.220<br>±0.005 | Sesquiterpene               |
| 29. | 17.153 | Myo-inositol                                                                                                                                        | 194 ([M+], 0 %), 87 (100%), 73 (90%), 85 (61%)     | 19.172<br>±0.014 | 12.673<br>±0.009 | 11.265<br>±0.011 | 4.766<br>±0.007 | Polysaccharide              |
| 30. | 21.504 | Epimetendiol                                                                                                                                        | 304 ([M+], 1 %), 105 (100%), 91 (93%), 93 (88%)    | 1.891<br>±0.005  | 3.654<br>±0.007  | nd               | nd              | Steroid                     |
| 31. | 21.514 | 1,3,6,10-Cyclotetradecatetraene,<br>3,7,11-trimethyl-14-(1-meth-<br>ylethyl)-, [S-(E,Z,E,E)]-                                                       | 272 ([M+], 9 %), 93 (100%), 105 (80%), 107 (76%)   | nd               | nd               | nd               | 1.786<br>±0.004 | Cembrane<br>diterpenoids    |
| 32. | 22.908 | Isocembrol                                                                                                                                          | 290 ([M+], 1 %), 43 (100%), 81 (58 %), 41 (54 %)   | nd               | nd               | 0.388<br>±0.008  | 1.221<br>±0.006 | Diterpenoid                 |
| 33. | 22.923 | (1R,4aR,5S)-5-((E)-5-Methoxy-3-<br>methylpent-3-en-1-yl)-1,4a-dime-<br>thyl-6-methylenedecahydronaph-<br>thalene-1-carbaldehyde                     | 318 ([M+], 1 %), 81 (100%), 107 (80%), 55 (76%)    | 0.754<br>±0.007  | 1.830<br>±0.008  | nd               | nd              | Aromatic alde-<br>hyde      |
| 34. | 23.159 | Dehydroabietinol                                                                                                                                    | 286 ([M+], 38 %), 253 (100%), 271 (93%), 173 (53%) | nd               | 0.721<br>±0.004  | nd               | nd              | Diterpenoid                 |
| 35. | 23.783 | Cyclopropaneoctanoic acid, 2-[[2-<br>[(2-ethylcyclopropyl)methyl]cy-<br>clopropyl]methyl]-, methyl ester                                            | 334 ([M+], 1 %), 41 (100%), 55 (93%), 67 (89%)     | 0.948<br>±0.003  | 2.525<br>±0.008  | nd               | nd              | Fatty acid ester            |
| 36. | 23.933 | (1R,4aR,5S)-5-[(E)-5-Hydroxy-3-<br>methylpent-3-enyl]-1,4a-dime-<br>thyl-6-methylidene-3,4,5,7,8,8a-<br>hexahydro-2H-naphthalene-1-<br>carbaldehyde | 304 ([M+], 1 %), 81 (100%), 107 (89%), 123 (78%)   | 0.775<br>±0.005  | 1.899<br>±0.011  | nd               | nd              | Cyclic aldehyde             |
| 37. | 25.725 | Methyl 5,11,14-eicosatrienoate                                                                                                                      | 320 ([M+], 2 %), 67 (100%), 81 (79%), 79 (71%)     | 0.575<br>±0.004  | nd               | nd               | nd              | Fatty acid esters           |
| 38. | 34.863 | Nonacosan-10-ol                                                                                                                                     | 424 ([M+], 0 %), 83 (100%), 97 (66%), 57 (59%)     | nd               | 2.666<br>±0.012  | nd               | 4.452<br>±0.015 | Fatty alcohol               |

<sup>1</sup>JB1E – Juniper berries in the first year of maturation, 70% ethanol; JB1A – Juniper berries in the first year of maturation, acetone; JB2E – Juniper berries in the second year of maturation, 70% ethanol; JB2A – Juniper berries in the second year of maturation, acetone; <sup>2</sup>Peak number; <sup>3</sup>tr – retention time; <sup>4</sup>ω – mass fraction of the component as area in % of the 100.00% of all identified peaks; <sup>5</sup>nd: not detected; \* – components with content ≥ 0.040 % wt. of extract are given, each value represents mean ± SD (n = 3, p = 0.95); \*\* m/z – the ratio of the mass of an ion to its charge; \*\*\* – [M+] (EI – electron ionization at 70 eV)

[illegible]

**(B)**

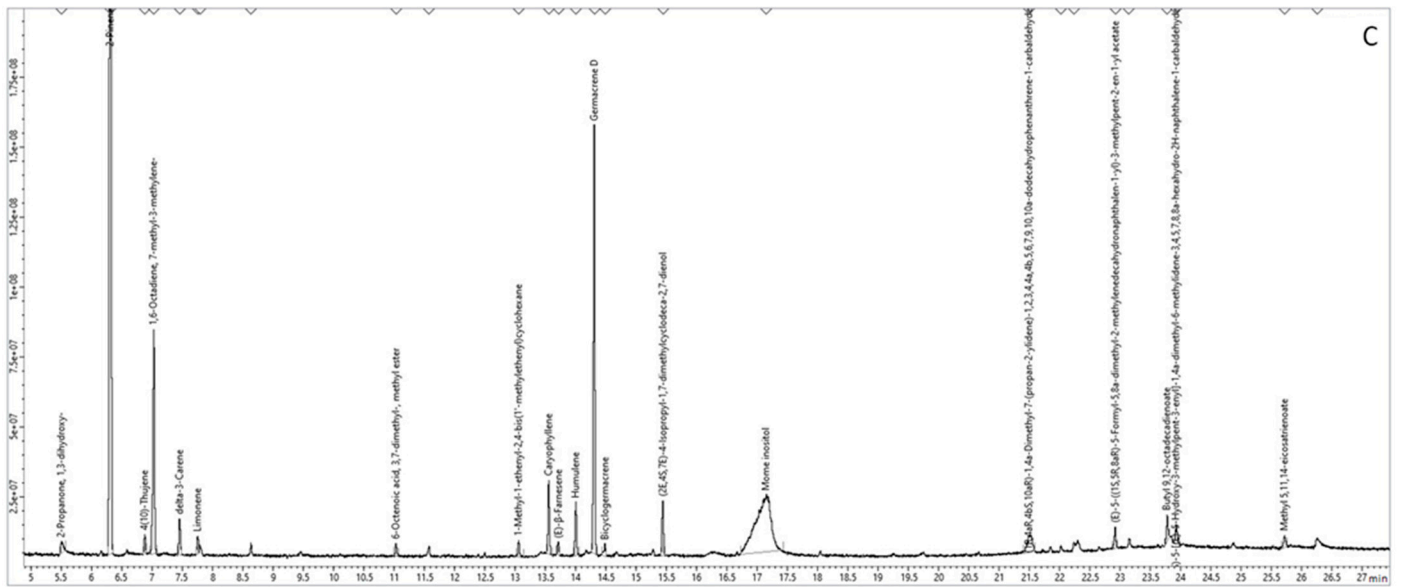

(C)

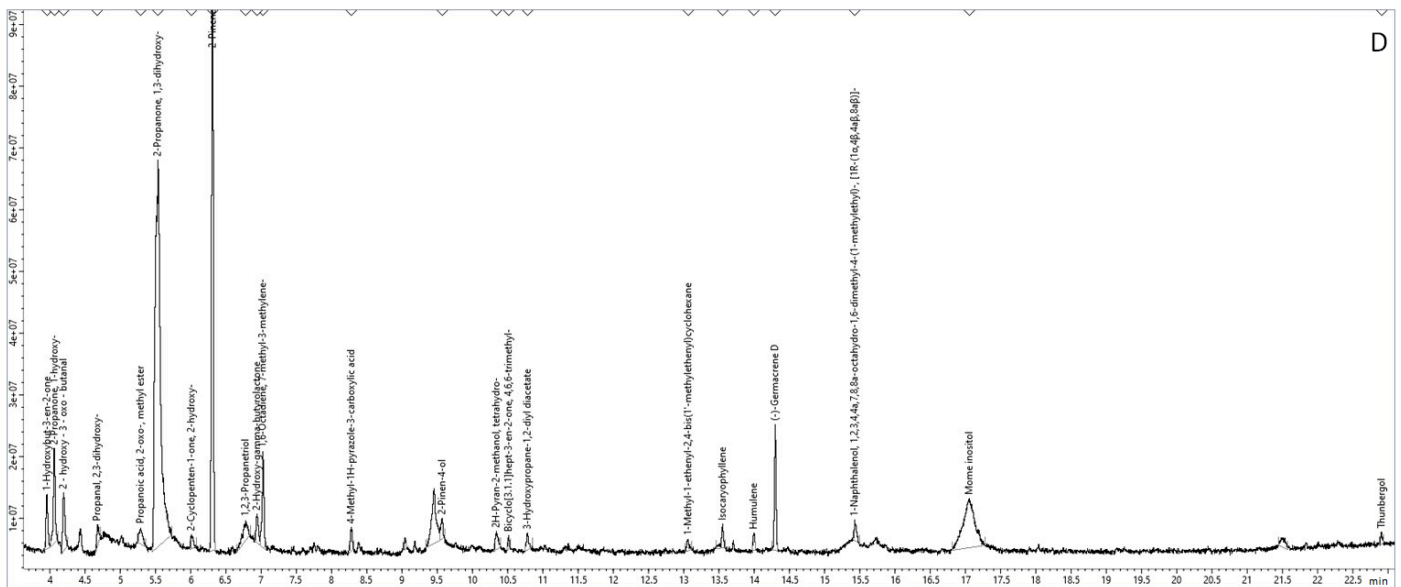

(D)
